# Supplementary material
Source: PubMed Central journal article supplement (PMC5906152)
Supplement: NIHMS926887-supplement-Supp_info.pdf [file NIHMS926887-supplement-Supp_info.pdf]

## H19 PTBP1 Figure S1

### Diagram of feeding models

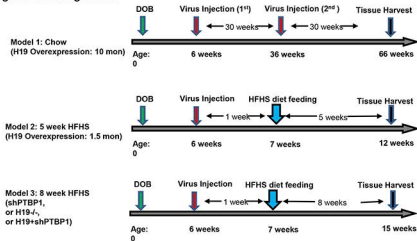

#### Virus particles:

AAV8-Null:  $5 \times 10^{10}$  viral particles/mouse

AAV8-H19:  $5 \times 10^{10}$  viral particles/mouse

Lenti-non target:  $0.8 \times 10^8$  viral particles/mouse

Lenti-ShPTBP1:  $0.8 \times 10^8$  viral particles/mouse

**Fig. S1:** Mouse models used for this study. The detailed timeline for AAV8-mediated H19 overexpression and lentivirus mediated PTBP1 knockdown is indicated. **Red:** The titers of viruses used for tail vein injection.

## H19 PTBP1 Figure. S2

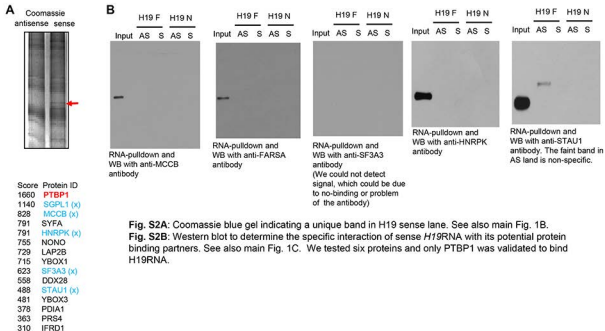

**Fig. S2A:** Coomassie blue gel indicating a unique band in H19 sense lane. See also main Fig. 1B.

**Fig. S2B:** Western blot to determine the specific interaction of sense *H19*RNA with its potential protein binding partners. See also main Fig. 1C. We tested six proteins and only PTBP1 was validated to bind *H19*RNA.

**Fig. S3A:** PTB binding sites within SREBP1c (Human)General calculation parameters

Genome: Human (hg38)

Selected motifs: PTBP1(Hs/Mm):cucucu, PTBP1(Hs/Mm):ucuu

Stringency level: Medium

Conservation filter: Off

CDS

**Results for sequence:** SREBF1-003 cds:KNOWN\_protein\_coding

Genomic position: N/A (BLAT could not find at least 95% identity match for the sequence).

 **View binding sites predictions summary**

Protein: PTBP1(Hs/Mm)

| Position | Motif  | Occurrence                                                               | Z-score | P-value  |
|----------|--------|--------------------------------------------------------------------------|---------|----------|
| 315      | UCUU   | gcucccccaggcagc <u>u</u> gucuccacc <u>uCCU</u> gccacauugagcuccucucuugaag | 2.134   | 1.64e-02 |
| 331      | CUCUCU | gucuccaccuccugccacauugagc <u>uCCUCU</u> cuugaagccuuccugagcgggcccgc       | 2.259   | 1.19e-02 |
| 333      | CUCUCU | cuccaccuccugccacauugagcuc <u>CUCUCU</u> ugaagccuuccugagcgggcccgcag       | 2.955   | 1.56e-03 |
| 334      | UCUU   | uccaccuccugccacauugagcucc <u>UCUCU</u> ugaagccuuccugagcgggcccgc          | 2.134   | 1.64e-02 |
| 335      | CUCUCU | ccaccuccugccacauugagcucc <u>uCCUUG</u> aagccuuccugagcgggcccgcaggc        | 2.214   | 1.34e-02 |
| 336      | UCUU   | caccuccugccacauugagcucc <u>uCCUUG</u> aagccuuccugagcgggcccgcagg          | 2.688   | 3.59e-03 |
| 344      | UCUU   | gccacauugagcuccucucuugaag <u>CCUU</u> ccugagcgggcccgcaggcagcgc           | 2.089   | 1.84e-02 |
| 345      | CUCUCU | ccacauugagcuccucucuugaagc <u>CUUCU</u> gagcgggcccgcaggcagcgcucca         | 2.277   | 1.14e-02 |
| 347      | UCUU   | acauugagcuccucucuugaagccu <u>CCU</u> gagcgggcccgcaggcagcgcucca           | 2.098   | 1.80e-02 |
| 430      | CUCUCU | uccauugaagauguaccgguccaug <u>CCCGCU</u> uucuccccugggccugguaucaagg        | 1.884   | 2.98e-02 |
| 432      | CUCUCU | cauugaagauguaccgguccaugcc <u>CGUUU</u> cuuccccugggccugguaucaaggaa        | 1.884   | 2.98e-02 |
| 434      | CUCUCU | uugaagauguaccgguccaugcccg <u>UUUUU</u> cuuccccugggccugguaucaaggaa        | 2.250   | 1.22e-02 |
| 436      | CUCUCU | gaagauguaccgguccaugcccg <u>UUUCU</u> ccugggcccugguaucaaggaa              | 1.884   | 2.98e-02 |
| 438      | CUCUCU | agauguaccgguccaugcccg <u>UUUCU</u> ccugggcccugguaucaaggaa                | 1.884   | 2.98e-02 |
| 591      | CUCUCU | ccaccuccuguuaggcuaccaccag <u>CCUCC</u> gggaggcucucuaacaggaaagccu         | 1.884   | 2.98e-02 |
| 604      | CUCUCU | aggcuaccaccagccuccgggaggc <u>UUUCU</u> acaggaaagccuccccgggaaacccc        | 2.250   | 1.22e-02 |
| 606      | CUCUCU | gcuaccaccagccuccgggaggc <u>UUUCU</u> acaggaaagccuccccgggaaaccccag        | 1.884   | 2.98e-02 |
| 618      | CUCUCU | cuccgggaggcucucuaacaggaaag <u>CCUCC</u> gggaaacaccagcagccgcugccu         | 1.884   | 2.98e-02 |
| 620      | CUCUCU | ccgggaggcucucuaacaggaaagcc <u>UCCU</u> gggaaacaccagcagccgcugccug         | 1.884   | 2.98e-02 |

**Fig. S3A:** PTB binding sites within SREBP1c (Human), continued

|      |        |                                                                     |       | <b>CDS</b> |
|------|--------|---------------------------------------------------------------------|-------|------------|
| 834  | CUCUCU | ugcagccccacucaucaaggcagagac <u>CUCgCU</u> gcuucugacagccaugaagacagac | 1.929 | 2.69e-02   |
| 887  | CUCUCU | gacggagccacugugaaggcggcag <u>gucucA</u> guccccuggucucuggcaccacuguc  | 1.911 | 2.80e-02   |
| 889  | CUCUCU | cggagccacugugaaggcggcaggu <u>CUCAGU</u> ccccuggucucuggcaccacugugc   | 1.911 | 2.80e-02   |
| 901  | CUCUCU | gaaggcggcagguucacaguccccug <u>gucucU</u> ggcaccacugugcagacagggccuu  | 2.259 | 1.19e-02   |
| 903  | CUCUCU | aggcggcagguucacaguccccuggu <u>CUCUGG</u> caccacugugcagacagggccuuug  | 1.884 | 2.98e-02   |
| 912  | CUCUCU | gucucaguccccugguucucuggcacc <u>CaCUGU</u> gcagacagggccuuugccgaccucg | 1.884 | 2.98e-02   |
| 959  | UCUU   | ccgaccucggugaguggcggaaacca <u>uCUU</u> ggcaacaguccaccugguuguagau    | 2.161 | 1.53e-02   |
| 1175 | UCUU   | gaggcaaaugcugaauaaucugcug <u>uCUU</u> ggcgaaggccaucgacuaacauucgc    | 2.161 | 1.53e-02   |
| 1199 | CUCUCU | gucuuugcgaaggccaucgacuaaca <u>uuCgCU</u> uucugcaacacagcaaccagaaacu  | 1.741 | 4.08e-02   |
| 1201 | CUCUCU | cuuugcgaaggccaucgacuaacau <u>CgCUUU</u> cugcaacacagcaaccagaaacua    | 1.741 | 4.08e-02   |
| 1203 | CUCUCU | ugcgaaaggccaucgacuaacauucg <u>CUUUUG</u> caacacagcaaccagaaacuaag    | 2.107 | 1.76e-02   |
| 1252 | CUCUCU | acuaaagcaggagaaaccuaagucug <u>CgCaCU</u> gucguccacaaaagcaaaucucuga  | 1.839 | 3.30e-02   |
| 1259 | CUCUCU | caggagaaccuaagucugcgacug <u>CUGUCC</u> caaaaagcaaaucucugaaggauuc    | 1.839 | 3.30e-02   |
| 1275 | CUCUCU | ugcgacugcuguccacaaaagcaa <u>auCUCU</u> gaaggauucugguugcggccuguggc   | 2.214 | 1.34e-02   |
| 1277 | CUCUCU | cgcacugcuguccacaaaagcaaa <u>uCuCUG</u> aaggauucugguugcggccuguggcag  | 1.839 | 3.30e-02   |
| 1515 | CUCUCU | gcaaggcaaaagccaagagcagcggcc <u>gucucU</u> gcacagccggggcaugcuggaccgc | 1.839 | 3.30e-02   |
| 1568 | UCUU   | cgucucccgccuggccucugcacg <u>uCUgU</u> uuuccucugccuguccugcaacccc     | 2.098 | 1.80e-02   |
| 1571 | UCUU   | ucccgccuggccucugcacgcu <u>uCUU</u> ccucugccuguccugcaaccccucg        | 2.688 | 3.59e-03   |
| 1574 | UCUU   | cgccuggccucugcacgcu <u>uCCU</u> cugccuguccugcaaccccucggcc           | 2.134 | 1.64e-02   |
| 1577 | UCUU   | cuggccucugcacgcu <u>uCUg</u> ccuguccugcaaccccucggccucc              | 2.134 | 1.64e-02   |
| 1585 | UCUU   | gugcacgcuugcuuccucugccug <u>uCCU</u> gcaaccccucggccuccucugggg       | 2.161 | 1.53e-02   |
| 1595 | UCUU   | gucuuuccucugccuguccugcaacc <u>CCUU</u> ggccuccucugggggcccgggg       | 2.152 | 1.57e-02   |

**Fig. S3A:** PTB binding sites within SREBP1c (Human), continued

|      |        |                                                                                                                                              |       | CDS      |
|------|--------|----------------------------------------------------------------------------------------------------------------------------------------------|-------|----------|
| 1763 | UCUU   | uggcugcuc <del>aa</del> uggg <del>gc</del> ug <del>u</del> uggg <del>ug</del> <b>ucg</b> ucuccuugggugcucucuuugucua <del>c</del>              | 2.161 | 1.53e-02 |
| 1765 | CUCUCU | gcugcuc <del>aa</del> uggg <del>gc</del> ug <del>u</del> uggg <del>ug</del> <b>uc</b> uc <del>cc</del> uugggugcucucuuugucua <del>c</del> ggg | 2.107 | 1.76e-02 |
| 1766 | UCUU   | cugcuc <del>aa</del> uggg <del>gc</del> ug <del>u</del> uggg <del>ug</del> <b>uc</b> uc <del>cc</del> uugggugcucucuuugucua <del>c</del> ggg  | 2.161 | 1.53e-02 |
| 1767 | CUCUCU | ugcuc <del>aa</del> uggg <del>gc</del> ug <del>u</del> uggg <del>ug</del> <b>uc</b> uc <del>cc</del> uugggugcucucuuugucua <del>c</del> ggg   | 2.107 | 1.76e-02 |
| 1768 | UCUU   | gcuc <del>aa</del> uggg <del>gc</del> ug <del>u</del> uggg <del>ug</del> <b>uc</b> uc <del>cc</del> uugggugcucucuuugucua <del>c</del> ggg    | 2.161 | 1.53e-02 |
| 1769 | UCUU   | cuc <del>aa</del> uggg <del>gc</del> ug <del>u</del> uggg <del>ug</del> <b>uc</b> uc <del>cc</del> uugggugcucucuuugucua <del>c</del> ggg     | 2.161 | 1.53e-02 |
| 1776 | UCUU   | ggcug <del>u</del> uggg <del>ug</del> <b>uc</b> uc <del>cc</del> uugggugcucucuuugucua <del>c</del> ggg                                       | 2.161 | 1.53e-02 |
| 1778 | CUCUCU | cug <del>u</del> uggg <del>ug</del> <b>uc</b> uc <del>cc</del> uugggugcucucuuugucua <del>c</del> ggg                                         | 2.652 | 4.00e-03 |
| 1779 | UCUU   | ug <del>u</del> uggg <del>ug</del> <b>uc</b> uc <del>cc</del> uugggugcucucuuugucua <del>c</del> ggg                                          | 2.161 | 1.53e-02 |
| 1780 | CUCUCU | gu <del>u</del> ggg <del>ug</del> <b>uc</b> uc <del>cc</del> uugggugcucucuuugucua <del>c</del> ggg                                           | 2.652 | 4.00e-03 |
| 1781 | UCUU   | u <del>u</del> ggg <del>ug</del> <b>uc</b> uc <del>cc</del> uugggugcucucuuugucua <del>c</del> ggg                                            | 2.714 | 3.32e-03 |
| 1782 | CUCUCU | u <del>g</del> ggg <del>ug</del> <b>uc</b> uc <del>cc</del> uugggugcucucuuugucua <del>c</del> ggg                                            | 2.098 | 1.80e-02 |
| 1784 | CUCUCU | gugcucgucuc <del>cc</del> uugggugcucucuuugucua <del>c</del> ggg                                                                              | 2.098 | 1.80e-02 |
| 1787 | UCUU   | cucguc <del>cc</del> uugggugcucucuuugucua <del>c</del> ggg                                                                                   | 2.161 | 1.53e-02 |
| 2003 | CUCUCU | aa <del>cc</del> uc <del>au</del> ccgucac <del>cc</del> ugcugcagc <b>guc</b> uc <del>gg</del> ggggggccgucggcaggccg                           | 2.116 | 1.72e-02 |
| 2005 | CUCUCU | ccuc <del>au</del> ccgucac <del>cc</del> ugcugcagc <b>guc</b> uc <del>gg</del> ggggggccgucggcaggccg                                          | 1.741 | 4.08e-02 |
| 2019 | CUCUCU | ugcugcagcgcucucggggggccg <b>guc</b> uc <del>gg</del> ggggggcaggccg                                                                           | 1.732 | 4.16e-02 |
| 2288 | UCUU   | agagugaagaccagucuccacggg <b>ccu</b> ugcauuuuucugacacgcucuuuccug                                                                              | 2.152 | 1.57e-02 |
| 2295 | UCUU   | agaccagucuccacggg <b>ccu</b> ugcauuuuucugacacgcucuuuccugagcagug                                                                              | 2.152 | 1.57e-02 |
| 2298 | UCUU   | ccagucuccacggg <b>ccu</b> ugcauuuu <b>uc</b> ugacacgcucuuuccugagcagugcc                                                                      | 2.152 | 1.57e-02 |
| 2306 | UCUU   | ccacggg <b>ccu</b> ugcauuuuucugacac <b>guc</b> uc <del>cc</del> uugggugcucucuuugucua <del>c</del> ggg                                        | 2.134 | 1.64e-02 |
| 2309 | UCUU   | cggg <b>ccu</b> ugcauuuuucugacacgcuc <u>uuccugagcagugcccgccaggccugc</u>                                                                      | 2.688 | 3.59e-03 |

**Fig. S3A:** PTB binding sites within SREBP1c (Human), continued

|      |        |                                                                    |       | CDS      |
|------|--------|--------------------------------------------------------------------|-------|----------|
| 2312 | UCUU   | gccuugcauuuucugacacgcuu <u>UCCU</u> gagcagugcccgccaggccugocug      | 2.134 | 1.64e-02 |
| 2378 | UCUU   | ucagugccuccugccaugcaguggc <u>UCUG</u> ccaccccggggccaccoguucuuuc    | 1.884 | 2.98e-02 |
| 2402 | UCUU   | cucugccaccccggggccaccgu <u>UCUU</u> cguggauggggacugguoccgugcuc     | 2.446 | 7.22e-03 |
| 2501 | UCUU   | gacccccuggcccaggugacucagc <u>UAUU</u> ccgggaacaucucuuagagcgagca    | 1.884 | 2.98e-02 |
| 2513 | CUCUCU | caggugacucagcuaauccgggaac <u>CAUCUCU</u> uagagcgagcacugaacugugugac | 2.116 | 1.72e-02 |
| 2514 | UCUU   | aggugacucagcuaauccgggaac <u>UCUCU</u> uagagcgagcacugaacuguguga     | 1.884 | 2.98e-02 |
| 2515 | CUCUCU | ggugacucagcuaauccgggaac <u>UCUU</u> agagcgagcacugaacugugugaccc     | 1.741 | 4.08e-02 |
| 2516 | UCUU   | gugacucagcuaauccgggaac <u>UCUU</u> agagcgagcacugaacugugugacc       | 2.446 | 7.22e-03 |
| 2535 | CUCUCU | aacaucucuuagagcgagcacuga <u>UCUGUGU</u> gacccagcccaaccccagccuggg   | 1.741 | 4.08e-02 |
| 2719 | CUCUCU | cgagaccccggggccaaguggggg <u>CCUCU</u> cugacagcugugugauccacuggc     | 2.107 | 1.76e-02 |
| 2721 | CUCUCU | uagaccccggggccaaguggggg <u>CCUCUCU</u> gacagcuguggugauccacuggcug   | 2.946 | 1.61e-03 |
| 2723 | CUCUCU | gacccggggccaaguggggg <u>CCUCUGA</u> cagcuguggugauccacuggcugcg      | 2.205 | 1.37e-02 |
| 2745 | CUCUCU | ccucucugacagcugugugaucc <u>UCGGCU</u> gcggggggaugaggaggcggcugag    | 2.098 | 1.80e-02 |
| 3002 | UCUU   | agcuccauugacaaggccggcagc <u>UGUU</u> ccugugugaccugcuucuuuguggug    | 2.027 | 2.13e-02 |
| 3005 | UCUU   | uccauugacaaggccggcagcug <u>UCCU</u> gugugaccugcuucuuuguggugcgc     | 2.027 | 2.13e-02 |
| 3018 | UCUU   | ccgugcagcuguuccugugugaccu <u>GUU</u> cuuguggugcgcaccagccuguggc     | 2.027 | 2.13e-02 |
| 3021 | UCUU   | ugcagcuguuccugugugaccugcu <u>UCUU</u> gugugcgcaccagccuguggcggc     | 2.580 | 4.94e-03 |

**Fig. S3A:** PTB binding sites within SREBP1c (Human) (Continued)

**General calculation parameters**

Genome: Human (hg38)  
Selected motifs: PTBP1(Hs/Mm):cucucu, PTBP1(Hs/Mm):ucuu  
Stringency level: Medium  
Conservation filter: Off

**3'UTR**

**Results for sequence:** SREBF1-003 utr3:KNOWN\_protein\_coding

Genomic position: chr17:17812073-17812621 Strand: -

[View binding sites predictions summary](#)

**Protein: PTBP1(Hs/Mm)**

| Position | Genomic coordinate | Motif  | Occurrence                                                                                                               | Z-score | P-value  |
|----------|--------------------|--------|--------------------------------------------------------------------------------------------------------------------------|---------|----------|
| 25       | chr17:17812597     | CUCUCU | a c c c c g u g u c c c c g g c c u c a g c a c <b>C C C U G U</b> c u c u a g c c a c u u g g u c c c g u g c a g       | 2.071   | 1.92e-02 |
| 27       | chr17:17812595     | CUCUCU | c c c c g u g u c c c c g g c c u c a g c a c c c <b>C U G U C U C U</b> c u a g c c a c u u g g u c c c g u g c a g c u | 2.625   | 4.33e-03 |
| 29       | chr17:17812593     | CUCUCU | c c g u g u c c c c g g c c u c a g c a c c c c u <b>g u C U C U</b> a g c c a c u u g g u c c c g u g c a g c u u c     | 2.625   | 4.33e-03 |
| 31       | chr17:17812591     | CUCUCU | g u g u c c c c g g c c u c a g c a c c c c u g u <b>C U C U A G</b> c c a c u u g g u c c c g u g c a g c u u c u g     | 2.071   | 1.92e-02 |
| 38       | chr17:17812584     | CUCUCU | c g g c c u c a g c a c c c c g u c u c u a g c <b>C A C U U U</b> g g u c c c g u g c a g c u u c u g u c c u g c g     | 2.107   | 1.76e-02 |
| 373      | chr17:17812249     | CUCUCU | c u u g g c u u u c c c g g a c u g c a a g c a g <b>g g C U C U</b> g c c c c a g a g g c c u c u c u c c g u c g       | 2.759   | 2.90e-03 |
| 375      | chr17:17812247     | CUCUCU | u g g c u u c c c g g a c u g c a a g c a g g g <b>C U C U G C</b> c c c a g a g g c c u c u c u c c g u c g u g         | 2.759   | 2.90e-03 |
| 377      | chr17:17812245     | CUCUCU | g c u u u c c c g g a c u g c a a g c a g g g c u <b>C u g C C C</b> c a g a g g c c u c u c u c u c c g u c g u g g g   | 2.018   | 2.18e-02 |
| 388      | chr17:17812234     | CUCUCU | c u g c a a g c a g g g c u c u g c c c c a g a g <b>g C C U C U</b> c u c u c c g u c g u g g g a g a g a c g u g       | 2.750   | 2.98e-03 |
| 390      | chr17:17812232     | CUCUCU | g c a a g c a g g g c u c u g c c c c a g a g g c <b>C U C U C U</b> c u c c g u c g u g g g a g a g a c g u g u a       | 3.955   | 3.83e-05 |
| 392      | chr17:17812230     | CUCUCU | a a g c a g g g g c u c u g c c c c a g a g g c c u <b>C U C U C U</b> c c g u c g u g g g a g a g a c g u g u a c a     | 3.955   | 3.83e-05 |
| 394      | chr17:17812228     | CUCUCU | g c a g g g c u c u g c c c c a g a g g c c u c u <b>C U C U C C</b> g u c u g g g a g a g a c g u g u a c a u a         | 3.402   | 3.34e-04 |
| 396      | chr17:17812226     | CUCUCU | a g g g c u c u g c c c c a g a g g c c u c u c u <b>C U C C G U</b> c g u g g g a g a g a c g u g u a c a u a g u       | 2.750   | 2.98e-03 |
| 398      | chr17:17812224     | CUCUCU | g g c u c u g c c c c a g a g g c c u c u c u c u <b>C C G U C G</b> u g g g a g a g a c g u g u a c a u a g u g u       | 2.009   | 2.23e-02 |
| 537      | chr17:17812085     | UCUU   | u u g u a c a g a g a a u u a a a a a u g a a a u <b>u u u u</b> a u a a u c u g                                         | 2.027   | 2.13e-02 |
| 546      | chr17:17812076     | UCUU   | g a a u a a a a a u g a a a u u a u u u a a a <b>u C U G</b>                                                             | 2.027   | 2.13e-02 |

# H19 PTBP1 Figure. S3B-S3E

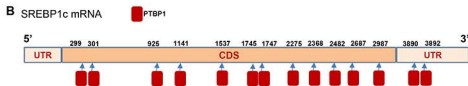

**Fig. S3B:** Diagram showing PTB binding sites within SREBP1c mRNA

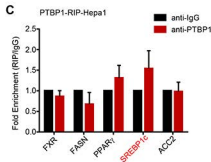

**Fig. S3C:** RNA IP to determine whether PTBP1 interacts with FXR, FASN, PPAR $\gamma$ , SREBP1c and ACC2 mRNAs (endogenous).

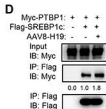

This is a repeating experiment of Figure 1B

**Fig. S3D:** Co-IP followed by Western blot to determine PTBP1 and SREBP1c protein interaction. See also main Fig. 1B.

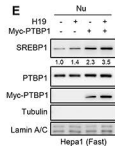

This is a repeating experiment of Figure 1C.

**Fig. S3E:** Western blot to determine the effect of H19 and PTBP1 on static levels of SREBP-1 protein. See also main Fig. 1C.



# H19 PTBP1 Figure. S4

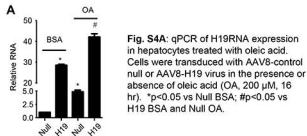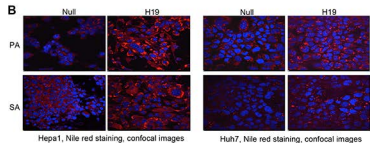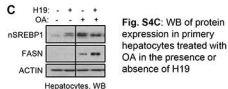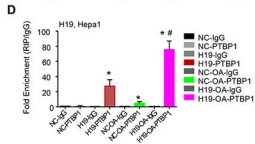

## H19 PTBP1 Figure. S5

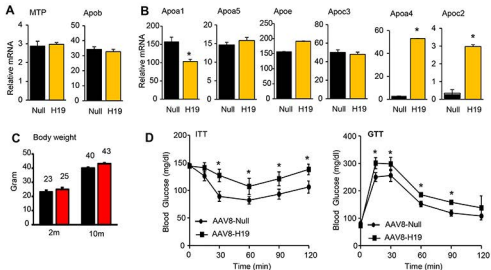

Fig. S5A-S5B: qPCR of gene expression in Null and H19 mice.

Fig. S5C: Body weight of Null and H19 mice at 2 month or 10 month after AAV8-virus transduction.

Fig. S5D: Insulin tolerance test (ITT) was performed after a 4 hr fast by an intraperitoneal injection of insulin at a dose of 2U/kg body weight. Glucose tolerance test (GTT) was performed in mice after an overnight fast by an intraperitoneal injection of glucose at a dose of 2 g/kg body weight. Blood was drawn from the tail vein at 0, 15, 30, 60, 90, and 120 minutes and glucose levels were measured using a glucometer (n=5-10 mice/group). Data are shown as mean  $\pm$  SEM, \*P<0.05 H19 vs Null.

The same mice as in Fig. 4C-4F.

# H19 PTBP1 Figure. S6

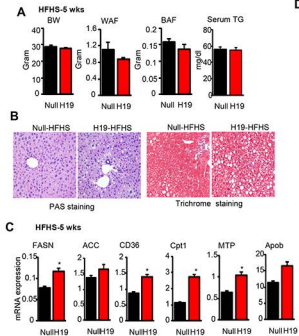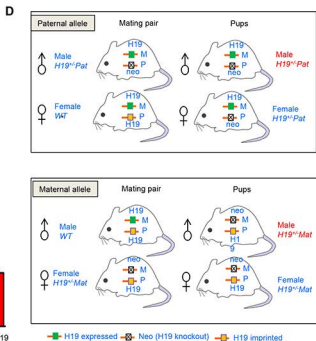

Fig. S6A: Body weight, WAF and BAF weights, and serum TG levels of Null and H19 mice under a HFHS diet for 5 weeks.  
 Fig. S6B: PAS and Trichrome staining of liver sections in Null and H19 mice under a HFHS diet for 5 wks.  
 Fig. S6C: qPCR of gene expression in Null and H19 mice under a HFHS diet for 5 wks.  
 Fig. S6D: Mating scheme to generate H19 knockout mice. Mice with H19 deleted from the paternal allele were used as control and mice with H19 deleted from maternal allele were H19<sup>-/-</sup>.  
 The same mice as in Fig. 5A-5C.

# H19 PTBP1 Figure. S7

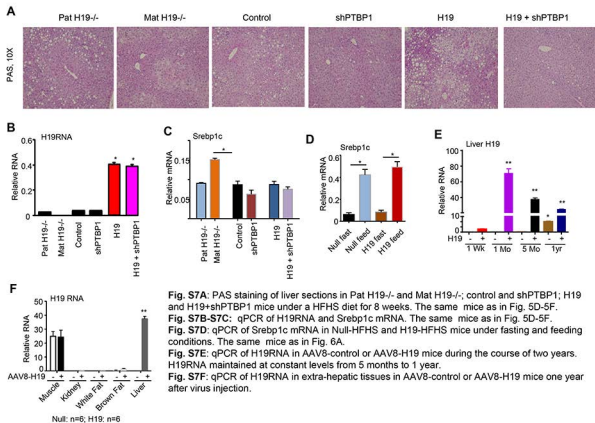

**Fig. S7A:** PAS staining of liver sections in Pat H19<sup>-/-</sup> and Mat H19<sup>-/-</sup>; control and shPTBP1; H19 and H19+shPTBP1 mice under a HFHS diet for 8 weeks. The same mice as in Fig. 5D-5F.

**Fig. S7B-S7C:** qPCR of H19RNA and Srebp1c mRNA. The same mice as in Fig. 5D-5F.

**Fig. S7D:** qPCR of Srebp1c mRNA in Null-HFHS and H19-HFHS mice under fasting and feeding conditions. The same mice as in Fig. 6A.

**Fig. S7E:** qPCR of H19RNA in AAV8-control or AAV8-H19 mice during the course of two years. H19RNA maintained at constant levels from 5 months to 1 year.

**Fig. S7F:** qPCR of H19RNA in extra-hepatic tissues in AAV8-control or AAV8-H19 mice one year after virus injection.

## H19 PTBP1 Figure. S8

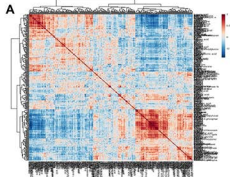

**Fig. S8A:** Correlation matrix. Pearson  $r$  was used for the distance measure. Correlation matrix showing correlation coefficients. Positive correlations are displayed in red and negative correlations in blue color. Color intensity and the size of the circle are proportional to the correlation coefficients

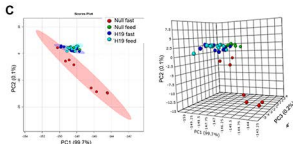

**Fig. S8C:** The PCA (principal component analysis) scores plots performed using two (left) or three (right) principal components corresponding to data obtained from Null-fast, Null-feed, H19-fast, and H19-feed mice. Each point summarizes all the information provided by the four different analytical conditions (145 identified metabolites). The ovals filled with different color donate 95% confidence interval Hotelling's ellipses. The PCA scores plots showed an almost complete separation between control-fast and other three groups.

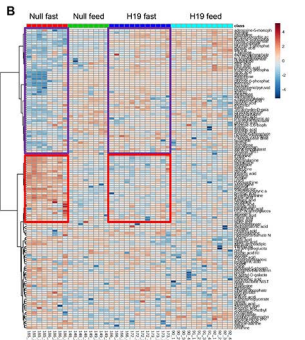

**Fig. S8B:** Heatmap showing clustered metabolites in indicated groups. Each column represents a sample, and each row represents a metabolite. Orange indicates above-mean intensity, blue denotes below-mean intensity, and the degree of color saturation reflects the magnitude of intensity relative to the mean. Heatmap was generated by MetaboAnalyst 3.0 using  $\log_2$  fold changes. Fasting causes significant changes in metabolites profiles relative to feeding in control null mice. However, such changes were blunted in H19-fast group. Each lane represents an individual sample. Purple box: metabolites levels decreased by fasting in Null-fast vs Null-feed, but not in H19-fast; red box: metabolites levels increased by fasting in Null-fast vs Null-feed, but not in H19-fast.

# H19 PTBP1 Figure. S9

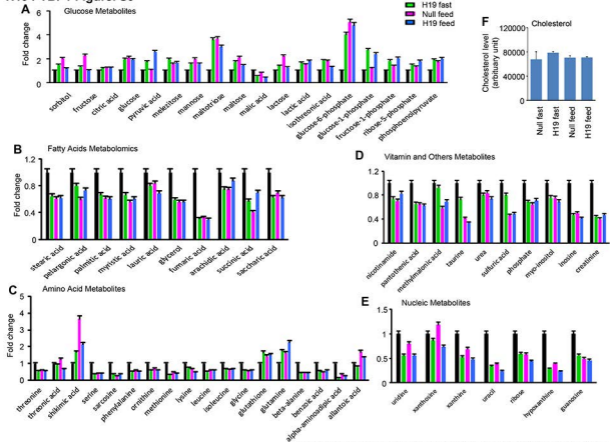

Fig. S9: Major metabolites altered by fasting or by H19. Null fast: set as 1.

# H19 PTBP1 Figure. S10

**A**

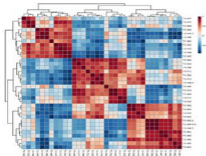

**Fig. S10A:** Correlation matrix showing correlation coefficients for triglyceride (TG) lipid species under fasting conditions only. Pearson  $r$  was used for the distance measure. Positive correlations are displayed in red and negative correlations in blue. Color intensity are proportional to the correlation coefficients.

**B**

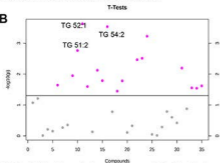

**Fig. S10B:** A  $t$ -test analysis showing metabolites that are significantly altered between Null and H19 mice. Each dot represents a metabolite plotted as a compound number (x-axis) and statistical significance ( $-\log_{10}$  (p-value), y-axis).

**C**

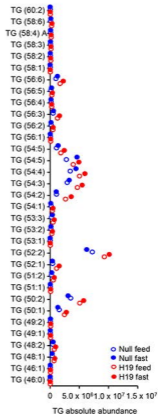

**Fig. S10C:** TG lipid species are expressed as absolute abundance according to TG chain length (top to bottom).

# H19 PTBP1 Figure. S11

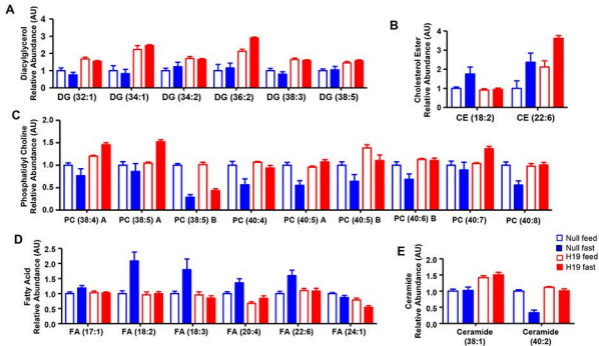

Fig. S11: Other lipid metabolites altered by fasting or by H19. Null feed: set as 1.



# lncRNA H19 Interacts with Polypyrimidine Tract-Binding Protein 1 to Reprogram Hepatic Lipid Homeostasis

Chune Liu, Zhihong Yang, Jianguo Wu, Li Zhang, Sangmin Lee, Dong-Ju Shin, Melanie Tran, Li Wang

## Supplemental Experimental Procedures

### Mouse Experiments

Wild-type C57BL/6J (Jackson Laboratory) and *H19*<sup>-/-</sup> mice (Venkatraman et al., 2013) were handled in accordance with guidelines from the Institutional Animal Care and Use Committee (IACUC). Because H19 is a paternal imprinted gene, maternal *H19*-deleted mice were used for experiments of H19 knockout (Mat *H19*<sup>-/-</sup>) and paternal *H19*-deleted mice (Pat *H19*<sup>-/-</sup>) were used as wild type controls. Five of randomized male mice (6 wks) of each group were injected via tail vein with purified adeno-associated viral vector serotype 8 (AAV8) viruses or lenti-viruses containing a liver-specific thyroxine-binding globulin (TBG) promoter driving H19 gene overexpression or Ptbp1 knockdown. Mice were fed a standard chow (Harlan Teklad, TD.2018 Teklad Global 18% Protein Rodent Diet) or a HFHS diet (Harlan Teklad, TD.08811 44.6%kcal Fat Diet (21% anhydrous milk fat, 2% soybean oil, 40.6% kcal carbohydrate and 14.8% kcal protein) (also see Supplemental Information and Supplementary Figure 1 for detailed experimental models and conditions). All samples were analyzed under fasting conditions unless otherwise indicated. Basic procedures to analyze animal metabolic phenotypes and serum parameters were described previously (Tabbi-Anneni et al., 2010). Metabolomics and lipidomics analyses were carried out at the UC Davis Metabolomics Center. Protocols for animal use were approved by IACUC at the University of Connecticut. The coded human liver specimens were obtained through the Liver Tissue Cell Distribution System (Minneapolis, Minnesota), which was funded by NIH Contract # HSN276201200017C.

### RNA Pull-down and Mass Spectrometry

RNA pull-down was performed according to a method described previously (Tsai et al., 2010). To prepare a plasmid construct as a template for RNA synthesis, H19 RNA was amplified by PCR and cloned into a pGEM-T Easy (Promega) cloning vector. Biotin-labeled RNA probes were prepared using *in vitro* transcription of appropriately linearized plasmid templates with biotin RNA labelling mix (Roche) and T7 or SP6 RNA polymerase, treated with RNase-free DNase I (Roche), and purified with the RNeasy Mini Kit (Qiagen). Aliquots of 2 µg of biotinylated RNAs were used for pull-down experiments. Total protein extracts were obtained from Hepa-1 cells with NP-40 buffer (1% NP-40, 150 mM NaCl, 50 mM Tris-Cl, pH 8.0, 0.5 mM DTT, 1 mM PMSF). Extracts containing 1 mg of protein were precleared with streptavidin magnetic beads (Promega) and then incubated with 2 µg of biotinylated RNA for 2 h at 4 °C. The bound proteins were recovered by further incubating with 20 µl of streptavidin magnetic beads for 1 h at 4 °C. Beads were washed briefly five times with washing buffer (10 mM Tris-HCl, 1 mM EDTA, and 2 mM NaCl), boiled in SDS-PAGE sample buffer. RNA-associated proteins were eluted and resolved by SDS-PAGE followed by Coomassie staining. The SDS-PAGE-separated band unique for *H19* sense RNA was excised and in-gel digested with trypsin for mass spectrometry (LC-MS) analysis at the Yale Keck Proteomics Center. Primers containing T7 or T3 promoter sequences used for synthesizing biotin-labelled H19 full length, H19 5'end, and also negative antisense RNA (complementary to sense RNA) are listed in Supplementary Table S1. Cytoplasmic and nuclear fractions from cultured cells or frozen liver tissues were extracted as

described (Zhou et al., 2010). Western blot analysis (Yang et al., 2013) with RIP pulled-down lysates was used to validate H19 interaction proteins.

### **RNA immunoprecipitation (RIP)**

RIP was performed as described in our previous protocol with slight modifications (Zhang et al., 2017). Cells ( $3 \times 10^6$ ) were UV-cross-linked at 254 nm ( $2000 \text{ J/m}^2$ ), followed by incubation within 200  $\mu\text{L}$  of lysis solution [0.5% NP40, 0.5%  $\text{C}_{24}\text{H}_{39}\text{O}_4\text{Na}$ , 200 U/mL RNase inhibitor (Promega), and protein inhibitor (Roche, Penzberg, Germany)] for 25 minutes with vigorous shaking. An anti-PTBP1 antibody or mouse immunoglobulin G (IgG) (Sigma) was added into the whole cell lysate for 1-2 hours on ice with gentle shaking. Antibody/Protein/RNA complexes were recruited using 30  $\mu\text{L}$  of protein A/G agarose beads (Sigma). RNAs associated with PTBP1 were recovered with Trizol-chloroform and analyzed by RT-PCR or qPCR.

### **Primary Hepatocyte Isolation and in vitro Transduction**

Hepatocytes were isolated from 5 individual wild type or 5 individual H19 overexpressed mice as previously described (Zhang et al., 2014). Briefly, the mice were anesthetized with Ketamine HCl 100mg/kg and Xylazine HCl 10mg/kg by i.p. injection and the abdomen was opened surgically. The liver was first perfused with 50 ml of Solution I (9.5 g/l Hank's balanced salt solution, 0.5 mmol/l EGTA, pH 7.2) and then perfused with 50 ml of Solution II (9.5 g/l Hank's balanced salt solution, 0.14 g/l collagenase IV, and 40 mg/l trypsin inhibitor, pH 7.5). After perfusion, the liver was transferred into a sterile petri dish and cells were dissociated with forceps up and down gently, then filtered through the 75 $\mu\text{m}$  pore mesh. The hepatocytes were then suspended in 50% percoll (Sigma), collected by centrifugation, and seeded onto collagen-coated culture plates in William E medium (Sigma). After a 4-hour incubation, the medium was replaced with William E fasting medium. On the second day, hepatocytes were infected with  $5 \times 10^{10}$  genome copies (GC) of AAV8-H19 or AAV8-Null. At 24 hour post-infection, the hepatocytes underwent specific treatments as indicated in figure legends.

### **Cell Lines and in vitro Transfection**

Human hepatocellular carcinoma (HCC) cell line Huh7, and mouse hepatocellular carcinoma (HCC) Hepa1 were purchased from ATCC in 2010 and were made aliquots and stored in a liquid nitrogen immediately after the first passage. All cell lines were last confirmed by short tandem repeat analysis of cellular DNA (PowerPlex1.2Kit; Promega) in 2015. When cells were recovered from liquid nitrogen in 2015 they were found to be free of mycoplasma (e-Myco Kit; Boca Scientific). The cell lines were passaged for less than 6 months when used for experiments. Huh7 and Hepa1 cells were maintained in DMEM supplemented with 10% fetal bovine serum (FBS), 100 IU/ml penicillin G, and 100  $\mu\text{g}/\text{ml}$  streptomycin (Invitrogen, NY, USA), 1 mM HEPES, 1 mM sodium pyruvate, 2 mM L-glutamine. Plasmids including Flag-SREBP1c and Myc-PTBP1 were transfected in vitro by X-tremeGENE HP DNA Transfection Reagent (Roche) as previously described (Zhang et al., 2016; Zhang et al., 2014). For luciferase reporter assay, Hepa1 cells were transiently transfected with a vector containing sterol response elements (SRE) ligated to a luciferase reporter in combination with a vector for SREBP1c in the presence or absence of PTBP1 or H19 co-expression. The luciferase activity was normalized to  $\beta$ -gal activity.

### **Histology Analysis**

Liver tissues were fixed in formalin on shaking device for 48 hours, paraffin embedded and then sliced into 5 $\mu\text{m}$  sections before subjecting to H&E staining, Periodic Acid-Schiff (PAS) staining and Trichrome Masson staining according to standard protocols. For the Oil Red O staining, 5 $\mu\text{m}$  frozen sections from snap-frozen liver tissues were fixed in 10% formalin for 30 min, stained in 0.5% Oil Red O in isopropanol for 15 min, and then in hematoxylin for the counter

staining of nuclei for 2 min. Nile red staining of cultured cells was performed to check intracellular neutral lipid accumulation as described (Wu et al., 2015). Digital images were captured under Fluorescent microscope (Olympus) or confocal microscope (Leica SP8). Eight randomly selected fields for each slide were analyzed with Image J. For quantification of Nile Red staining, eight Images were randomly chosen and submitted to Image J (version 2.0.0-rc-43/1.50g) analysis. Positive areas were selected, and the relative intensity was calculated and compared with the control group.

### **Western Blotting**

Protein lysates (30 µg) were resolved by SDS-PAGE and transferred to polyvinylidene fluoride membrane. Membranes were blocked, incubated with primary antibodies at 4°C overnight followed by horseradish peroxidase-conjugated corresponding secondary antibody incubation. Antibody binding was visualized with ECL substrate (Thermo Fisher Scientific, #34080) according to the manufacturer's protocol. The following antibodies were used at a dilution of 1:1,000: p-AKT (#4060), AKT (#9272), p-ERK (#4695), ERK (#9102), p-JNK (#9251), JNK (#9252) myc-tag (#2276), α-Tubulin (#2125), and Lamin A/C (#4777) were from Cell Signaling Technology; antibodies against PPARα (sc-9000), PPARγ (sc-7273), FASN (sc-20140), ACC (sc-30212), MCCB (sc-366942), STAU1 (sc-377484) and ACTIN (sc-47778 HRP) were purchased from Santa Cruz Biotechnology; antibodies against PTBP1 (ab83897), SF3A3 (ab176581) and HNRPK (ab32969) were purchased from Abcam; antibodies against SREBP1 (MA5-16124) and FARSA (PA5-51657) were purchased from Thermo Fisher Scientific; antibodies against PTBP1 were kindly provided by Dr. Douglas L. Black (UCLA Brain Research Institute); HRP-conjugated anti-mouse and anti-rabbit secondary antibodies were purchased from Thermo Fisher Scientific. HRP-conjugated FLAG antibody was purchased from Sigma. An antibody for SGLT1 (AF5535-SP) was purchased from R&D systems. For WB analysis, equal amounts of protein from five livers in each group (n=5/group) were pooled, and single or duplicate loading was used.

### **RNA Isolation and Real-time qPCR**

Total mRNA was isolated from frozen livers using TRIzol (Invitrogen) according to the manufacturers' instructions. RNA was quantified by NanoDrop 2000 Spectrophotometer (Thermo Scientific). Complementary DNA was synthesized from total RNA using iScript cDNA Synthesis Kit (BIO RAD). Quantitative RT-PCR using the SYBR Green Dye-based assay was performed on CFX384 Real-Time PCR System (BIO RAD). Data were normalized to hprt1 or 18S or to control samples.

### **Hepatic Lipid Extraction and Blood Chemistry**

Liver tissues and plasma samples were isolated from mice that had received a normal chow diet or a HFHS diet or that had been fasted as indicated. To determine hepatic triglyceride levels, approximately 200 mg of liver tissue was homogenized in chloroform/methanol followed by centrifugation. The lower chloroform phase was collected and evaporated under vacuum, and the residual lipids were resuspended with 10% Triton X-100. Triglyceride levels and free fatty acid levels were measured using commercial kits (BioAssay Systems). Hepatic triglyceride levels were determined by normalization to the mass of liver tissue used for measurement of triglyceride levels. Plasma samples were subjected to analysis for quantitation of triglyceride and free fatty acid levels using commercial kits (BioAssay Systems). Alanine transaminase (ALT) and Aspartate aminotransferase (AST) were measured by Infinity ALT (GPT) Liquid Stable Reagent and AST (GOT) Liquid Stable Reagent according to the manufacturer's instructions (Thermo Scientific). GTT and ITT were performed as previously described (Huang et al., 2007).

### **Protein Extraction and Fractionation**

Whole liver protein lysates were extracted with RIPA buffer supplemented with protease and phosphatase inhibitors. Cytoplasmic and nuclear fractions from cultured cells or frozen liver tissues were fractionated by cytoplasm lysis buffer (10mM HEPES, PH7.9; 10mM KCl; 0.1mM EDTA; 0.3% NP-40) and nucleus lysis buffer (20mM HEPES, PH7.9; 0.4M NaCl; 1mM EDTA; 25% Glycerol) (Zhou et al., 2010). Western blot analysis was performed, as described previously (Yang et al., 2013).

### **Metabolomics Analysis**

Metabolomics analyses were performed at the West Coast Metabolomics Center, UC Davis (Fiehn O. et al. *Plant J.* 53 (2008) 691–704). Briefly, 50 mg frozen liver tissues from each mouse were used for gas chromatography/mass spectrometry (GC/MS). All gas chromatography analyses were performed with an Agilent 6890 gas chromatograph controlled using Leco ChromaTOF software version 2.32 and a 30 m long, 0.25 mm internal diameter Rtx-5Sil MS column with 0.25  $\mu$ m 95% dimethyl/5% diphenyl polysiloxane film. A Leco Pegasus IV time-off light mass spectrometer was used with unit mass resolution at 17 spectra s<sup>-1</sup> from 80-500 Da at -70 eV ionization energy and 1800 V detector voltage with a 230°C transfer line and a 250°C ion source. Leco ChromaTOF vs. 2.32 was used for data preprocessing. The actual data were given as peak heights and processed to a variant of a 'vector normalization' by calculating the sum of all peak heights for all identified metabolites and a subsequent normalization to the average mTIC of each group if necessary.

### **Mass Spectrometry (LC-MS) Analysis**

Protein digests were analyzed using LC MS/MS on either a Waters/Micromass AB QSTAR Elite or a Thermo Scientific LTQ-Orbitrap XL mass spectrometer. Both systems are equipped with Waters nanoACQUITY ultra high pressure liquid chromatographs (UPLC) for peptide separation. The MS/MS spectra are searched in-house using the Mascot algorithm (Hirose et al, 1993) for un-interpreted MS/MS spectra after using the Mascot Distiller program to generate Mascot compatible files. The Mascot Distiller program combines sequential MS/MS scans from profile data that have the same precursor ion. A charge state of +2 and +3 are preferentially located with a signal to noise ratio of 1.2 or greater and a peak list is generated for database searching. Either the NCBI nr, a species specific, or a custom database (in FASTA format) is used for searching. All Mascot search results are loaded into the Yale Protein Expression Database (YPED) online viewing system for dissemination to the investigator.

Score: The protein score in a Peptide Summary is derived from the ions scores. For a search that contains a small number of queries, the protein score is the sum of the unique ions scores. That is, excluding the scores for duplicate matches. A small correction is applied to reduce the contribution of low-scoring random matches. This correction is a function of the total number of molecular mass matches for each query and the width of the peptide tolerance window. This correction is usually very small, except in no enzyme searches

<https://medicine.yale.edu/keck/proteomics/yped/>

### **Data availability**

Additional supporting data are available upon request from the corresponding author.

### **References**

Huang, J., Iqbal, J., Saha, P.K., Liu, J., Chan, L., Hussain, M.M., Moore, D.D., and Wang, L. (2007). Molecular characterization of the role of orphan receptor small heterodimer partner in development of fatty liver. *Hepatology* 46, 147-157.

Tabbi-Annani, I., Cooksey, R., Gunda, V., Liu, S., Mueller, A., Song, G., McClain, D.A., and Wang, L. (2010). Overexpression of nuclear receptor SHP in adipose tissues affects diet-induced obesity and adaptive thermogenesis. *American journal of physiology. Endocrinology and metabolism* 298, E961-970.

Tsai, M.C., Manor, O., Wan, Y., Mosammamaparast, N., Wang, J.K., Lan, F., Shi, Y., Segal, E., and Chang, H.Y. (2010). Long noncoding RNA as modular scaffold of histone modification complexes. *Science* 329, 689-693.

Venkatraman, A., He, X.C., Thorvaldsen, J.L., Sugimura, R., Perry, J.M., Tao, F., Zhao, M., Christenson, M.K., Sanchez, R., Yu, J.Y., Peng, L., Haug, J.S., Paulson, A., Li, H., Zhong, X.B., Clemens, T.L., Bartolomei, M.S., and Li, L. (2013). Maternal imprinting at the H19-Igf2 locus maintains adult haematopoietic stem cell quiescence. *Nature* 500, 345-349.

Wu, H., Ng, R., Chen, X., Steer, C.J., and Song, G. (2015). MicroRNA-21 is a potential link between non-alcoholic fatty liver disease and hepatocellular carcinoma via modulation of the HBP1-p53-Srebp1c pathway. *Gut*.

Yang, Z., Zhang, Y., and Wang, L. (2013). A feedback inhibition between miRNA-127 and TGFbeta/c-Jun cascade in HCC cell migration via MMP13. *PloS one* 8, e65256.

Zhang, L., Yang, Z., Trottier, J., Barbier, O., and Wang, L. (2017). Long noncoding RNA MEG3 induces cholestatic liver injury by interaction with PTBP1 to facilitate shp mRNA decay. *Hepatology* 65, 604-615.

Zhang, Y., Liu, C., Barbier, O., Smalling, R., Tsuchiya, H., Lee, S., Delker, D., Zou, A., Hagedorn, C.H., and Wang, L. (2016). Bcl2 is a critical regulator of bile acid homeostasis by dictating Shp and lncRNA H19 function. *Scientific reports* 6, 20559.

**Zhang, Y., Xu, N.,** Xu, J., Kong, B., Copple, B., Guo, G.L., and Wang, L. (2014). E2F1 is a novel fibrogenic gene that regulates cholestatic liver fibrosis through the Egr-1/SHP/EID1 network. *Hepatology* 60, 919-930.

Zhou, T., Zhang, Y., Macchiarulo, A., Yang, Z., Cellanetti, M., Coto, E., Xu, P., Pellicciari, R., and Wang, L. (2010). Novel polymorphisms of nuclear receptor SHP associated with functional and structural changes. *The Journal of biological chemistry* 285, 24871-24881.

**Supporting Table 1 Primers list**

| Primers* | Sequences (5' to 3')       |                           |
|----------|----------------------------|---------------------------|
|          | Sense                      | anti-sense                |
| hH19     | TGGTGCACTTTACAACCACTG      | ATGGTGTCTTTGATGTTGGGGC    |
| hPTBP1   | ATTGTCCCAGATATAGCCGTTG     | GCTGTCATTTCCGTTTGCTG      |
| hSREBF1  | CACCAGCGTCTACCATAGC        | AAAGAGAAGCACCAAGGAGAC     |
| mAcc2    | GCAGCTCCTATGCCTGGGTA       | TGCAGCCTGTGTGCGATAG       |
| mApoa1   | GGCACGTATGGCAGCAAGAT       | CCAAGGAGGAGGATTCAAAC      |
| mApoa4   | GAAGACGGATGTCACTCAGC       | CTTCACCCTCTCAGTTTCCTG     |
| mApoa5   | TCCTCGCAGTGTTTCGCAAG       | CGAAGCTGCCTTTTCAGGTTCT    |
| mApob    | TTGGCAAACCTGCATAGCATCC     | TCAAATTGGGACTCTCCTTTA     |
| mApoc2   | AAGACATACCCGATCAGCATG      | AGGAGAGTAAGGAGCTGGTC      |
| mApoc3   | GCGTGACAGGAGTCCGATATAG     | GAGTTGGTTGGTCCTCAGGGT     |
| mApoE    | CTGACAGGATGCCTAGCCG        | CGCAGGTAATCCCAGAAAGC      |
| mCD36    | GCGACATGATTAATGGCACAG      | GATCCGAACACAGCGTAGATAG    |
| mChREBP  | TAGACAACAACAAGATGGAGAACCG  | GCTGGGCTGGGCACTGAG        |
| mCpt1    | ACACCACATAGAGGCAGAAGAGG    | CACAACAACGGCAGAGCAGAG     |
| mEgr1    | GACGAGTTATCCCAGCCAAA       | GGCAGAGGAGACGATGAAG       |
| mFasn    | TCGGGTGTGGTGGGTTTGG        | GCGTGAGATGTGTTGCTGAGG     |
| mFxr     | GTGAATGAGGACGACAGCGAAG     | TGGTCTGCCGTGAGTTCCG       |
| mG6pc    | GGAAGGATGGAGGAAGGAATGAAC   | TCAGCAATCACAGACACAAGGATG  |
| mG6pd2   | TATGTGAAGAATGAACGGTGGGATG  | CGCCTGGTATATCTCGGAATTGC   |
| mGk      | CGGAGCAGAAGGGAACAACATC     | TCATTACCATTGCCACCACATC    |
| mH19     | GAACAGAAGCATTCTAGGCTG      | TTCTAAGTGAATTACGGTGGG     |
| mHgf     | GATTATTGCCCTATTTCCCGTTGTG  | CTACTGTTGTTTGTGTTGGAATGCC |
| mIrs1    | CAGCAGCAGTAGCAGCATCAG      | TACCGCCACCACTCTCAACAG     |
| mIrs2    | CCTCTACCACCACCGTCACC       | GGCGGCTCATCACCTCCTC       |
| mMtp     | GCCTTGAACCTTCCAACAAACCATAG | ATTACACCTGCCACTTGCTTCC    |
| mNr1d1   | TACATTGGCTCTAGTGGCTCC      | CAGTAGGTGATGGTGGGAAGT     |
| mPepck   | ACAGAAGGGCGAGAGAACCAG      | GGAAGGAAGGAGCATAGCAAAGC   |
| mPk      | GTGCCGCCTGGACATTGAC        | TTCAGCCGAGCCACATTCAATC    |
| mPpara   | AGAGCCCCATCTGTCTCTC        | ACTGGTAGTCTGCAAAACCAA     |
| mPparγ   | CCACAGTTGATTTCTCCAGCATTTTC | CAGGTTCTACTTTGATCGCACTTTG |
| mSrebf1  | TTGCTGGCTTGGTGTGCTATG      | CTGGTGGAGGGCTGGAAGG       |
| T3       | 5'-ATTAACCCTCACTAAAGG-3'   |                           |
| T7       | 5'AATACGACTCACTATAGG-3'    |                           |

\*h: human; m: mouse

Supporting Table 2

| PROTEIN ID  | PROTEIN NAME                                                       | MW    | % COVERAGE <sup>1</sup> | EMP AI <sup>2</sup> |
|-------------|--------------------------------------------------------------------|-------|-------------------------|---------------------|
| PTBP1_MOUSE | Polypyrimidine tract-binding protein 1                             | 56443 | 66.4                    | 4.02                |
| SGPL1_MOUSE | Sphingosine-1-phosphate lyase 1                                    | 63636 | 38                      | 2.92                |
| MCCB_MOUSE  | Methylcrotonoyl-CoA carboxylase beta chain, mitochondrial          | 61340 | 50.3                    | 2.14                |
| SYFA_MOUSE  | Phenylalanine--tRNA ligase alpha subunit                           | 57563 | 49                      | 2.39                |
| HNRPK_MOUSE | Heterogeneous nuclear ribonucleoprotein K                          | 50944 | 46                      | 2.97                |
| NONO_MOUSE  | Non-POU domain-containing octamer-binding protein                  | 54506 | 54.8                    | 3.22                |
| LAP2B_MOUSE | Lamina-associated polypeptide 2, isoforms beta/delta/epsilon/gamma | 50342 | 50.7                    | 2.71                |
| YBOX1_MOUSE | Nuclease-sensitive element-binding protein 1                       | 35709 | 49.4                    | 1.82                |
| SF3A3_MOUSE | Splicing factor 3A subunit 3                                       | 58805 | 35.3                    | 1.32                |
| DDX28_MOUSE | Probable ATP-dependent RNA helicase DDX28                          | 59478 | 31.3                    | 1.47                |
| STAU1_MOUSE | Double-stranded RNA-binding protein Staufen homolog 1              | 53891 | 38.8                    | 1.71                |
| YBOX3_MOUSE | Y-box-binding protein 3                                            | 38790 | 45.2                    | 1.34                |
| PDIA1_MOUSE | Protein disulfide-isomerase                                        | 57023 | 24                      | 0.92                |
| PRS4_MOUSE  | 26S protease regulatory subunit 4                                  | 49154 | 24.3                    | 0.66                |
| IFRD1_MOUSE | Interferon-related developmental regulator 1                       | 49903 | 17.8                    | 0.64                |
| PTBP3_MOUSE | Polypyrimidine tract-binding protein 3                             | 56665 | 32.3                    | 0.93                |
| HBB1_MOUSE  | Hemoglobin subunit beta-1                                          | 15830 | 44.9                    | 2.6                 |
| TBA1A_MOUSE | Tubulin alpha-1A chain                                             | 50104 | 21.5                    | 0.64                |
| RBM42_MOUSE | RNA-binding protein 42                                             | 49844 | 28.3                    | 0.79                |
| PAIRB_MOUSE | Plasminogen activator inhibitor 1 RNA-binding protein              | 44687 | 33.2                    | 0.91                |
| RL4_MOUSE   | 60S ribosomal protein L4                                           | 47124 | 28.6                    | 0.85                |
| FA98A_MOUSE | Protein FAM98A                                                     | 55021 | 22.7                    | 0.46                |
| HBA_MOUSE   | Hemoglobin subunit alpha                                           | 15076 | 41.5                    | 2.85                |
| KPYM_MOUSE  | Pyruvate kinase PKM                                                | 57808 | 31.1                    | 0.54                |
| DDX5_MOUSE  | Probable ATP-dependent RNA helicase DDX5                           | 69247 | 21.3                    | 0.35                |
| VIME_MOUSE  | Vimentin                                                           | 53655 | 21.7                    | 0.72                |
| HNRPQ_MOUSE | Heterogeneous nuclear ribonucleoprotein Q                          | 69590 | 17.5                    | 0.35                |
| HNRPF_MOUSE | Heterogeneous nuclear ribonucleoprotein F                          | 45701 | 18.8                    | 0.2                 |
| TCPD_MOUSE  | T-complex protein 1 subunit delta                                  | 58030 | 14.3                    | 0.33                |
| PLRG1_MOUSE | Pleiotropic regulator 1                                            | 56902 | 18.3                    | 0.24                |
| HNRH1_MOUSE | Heterogeneous nuclear ribonucleoprotein H                          | 49168 | 12.2                    | 0.18                |
| ATPA_MOUSE  | ATP synthase subunit alpha, mitochondrial                          | 59716 | 13.7                    | 0.23                |
| ALBU_MOUSE  | Serum albumin                                                      | 68648 | 11.7                    | 0.06                |
| RTCB_MOUSE  | tRNA-splicing ligase RtcB homolog                                  | 55214 | 24.4                    | 0.45                |
| RS27A_MOUSE | Ubiquitin-40S ribosomal protein S27a                               | 17939 | 21.8                    | 0.25                |
| GIMA1_MOUSE | GTPase IMAP family member 1                                        | 30809 | 10.8                    | 0.14                |
| LECT1_MOUSE | Leukocyte cell-derived chemotaxin 1                                | 37201 | 14.1                    | 0.12                |

Supporting Table 2

|                    |                                             |       |      |      |
|--------------------|---------------------------------------------|-------|------|------|
| <b>ZFY27_MOUSE</b> | Protrudin                                   | 46172 | 12.8 | 0.09 |
| <b>TBCA_MOUSE</b>  | Tubulin-specific chaperone A                | 12750 | 19.4 | 0.37 |
| <b>KCRU_MOUSE</b>  | Creatine kinase U-type, mitochondrial       | 46974 | 15.8 | 0.09 |
| <b>TMC6_MOUSE</b>  | Transmembrane channel-like protein 6        | 90487 | 10.6 | 0.05 |
| <b>ZMAT3_MOUSE</b> | Zinc finger matrin-type protein 3           | 31981 | 11.4 | 0.14 |
| <b>NFS1_MOUSE</b>  | Cysteine desulfurase, mitochondrial         | 50538 | 11.1 | 0.09 |
| <b>RT17_MOUSE</b>  | 28S ribosomal protein S17, mitochondrial    | 13373 | 26.7 | 0.36 |
| <b>TCPE_MOUSE</b>  | T-complex protein 1 subunit epsilon         | 59586 | 12.2 | 0.05 |
| <b>IQCAL_MOUSE</b> | IQ and AAA domain-containing protein 1-like | 95896 | 10.3 | 0.05 |
| <b>PDXK_MOUSE</b>  | Pyridoxal kinase SV=1                       | 34993 | 11.9 | 0.12 |
| <b>PAI1_MOUSE</b>  | Plasminogen activator inhibitor 1           | 45141 | 10.2 | 0.1  |

1. Percent coverage indicates as to what percent of amino acids (of a particular protein) were covered.

2. Empai value estimates the protein abundance using the correlation between the number of identified peptides and protein abundance. Empai shows a high (0.89) correlation with the actual protein amount in complex mixtures of proteins.



**Supporting Table 3.** Clinical and biochemical characteristics of patients with non-alcoholic steatohepatitis (NASH).

| Characteristics        | NASH-No-Fat (n=16) | NASH-Fat (n=20) |
|------------------------|--------------------|-----------------|
| Age (years)            | 57.2 ± 2.6         | 57.9 ± 1.8      |
| Gender, male/female    | 7/9                | 6/14            |
| MELD score             | 26.8 ± 2.1         | 30.2 ± 1.8      |
| Total bilirubin (mg/L) | 9.8 ± 3.2          | 13.8 ± 3.8      |
| Creatinine (mg/L)      | 3.9 ± 0.7          | 2.1 ± 0.31*     |
| Albumin (g/dL)         | 2.8 ± 0.14         | 3.0 ± 0.14      |
| AST (U/L)              | 74.4 ± 14.9        | 66.4 ± 6.8      |
| ALP (U/L)              | 225.5 ± 38.1       | 160.3 ± 20.9    |

Data are presented as means ± sem. MELD, model for end-stage liver disease; AST, aspartate transaminase, ALP; alkaline phosphatase. \* P<0.05 *versus* NASH-No-Fat by Students unpaired t-test.

The human liver specimens were obtained through the Liver Tissue Cell Distribution System (LTCDS) (Minneapolis, Minnesota). NASH-No-Fat samples are defined as NASH (No longer Fatty) and NASH-Fat samples are defined as NASH (with Fatty Liver) per LTCDS.
